# Supplementary material
Source: PubMed Central journal article supplement (PMC5563795)

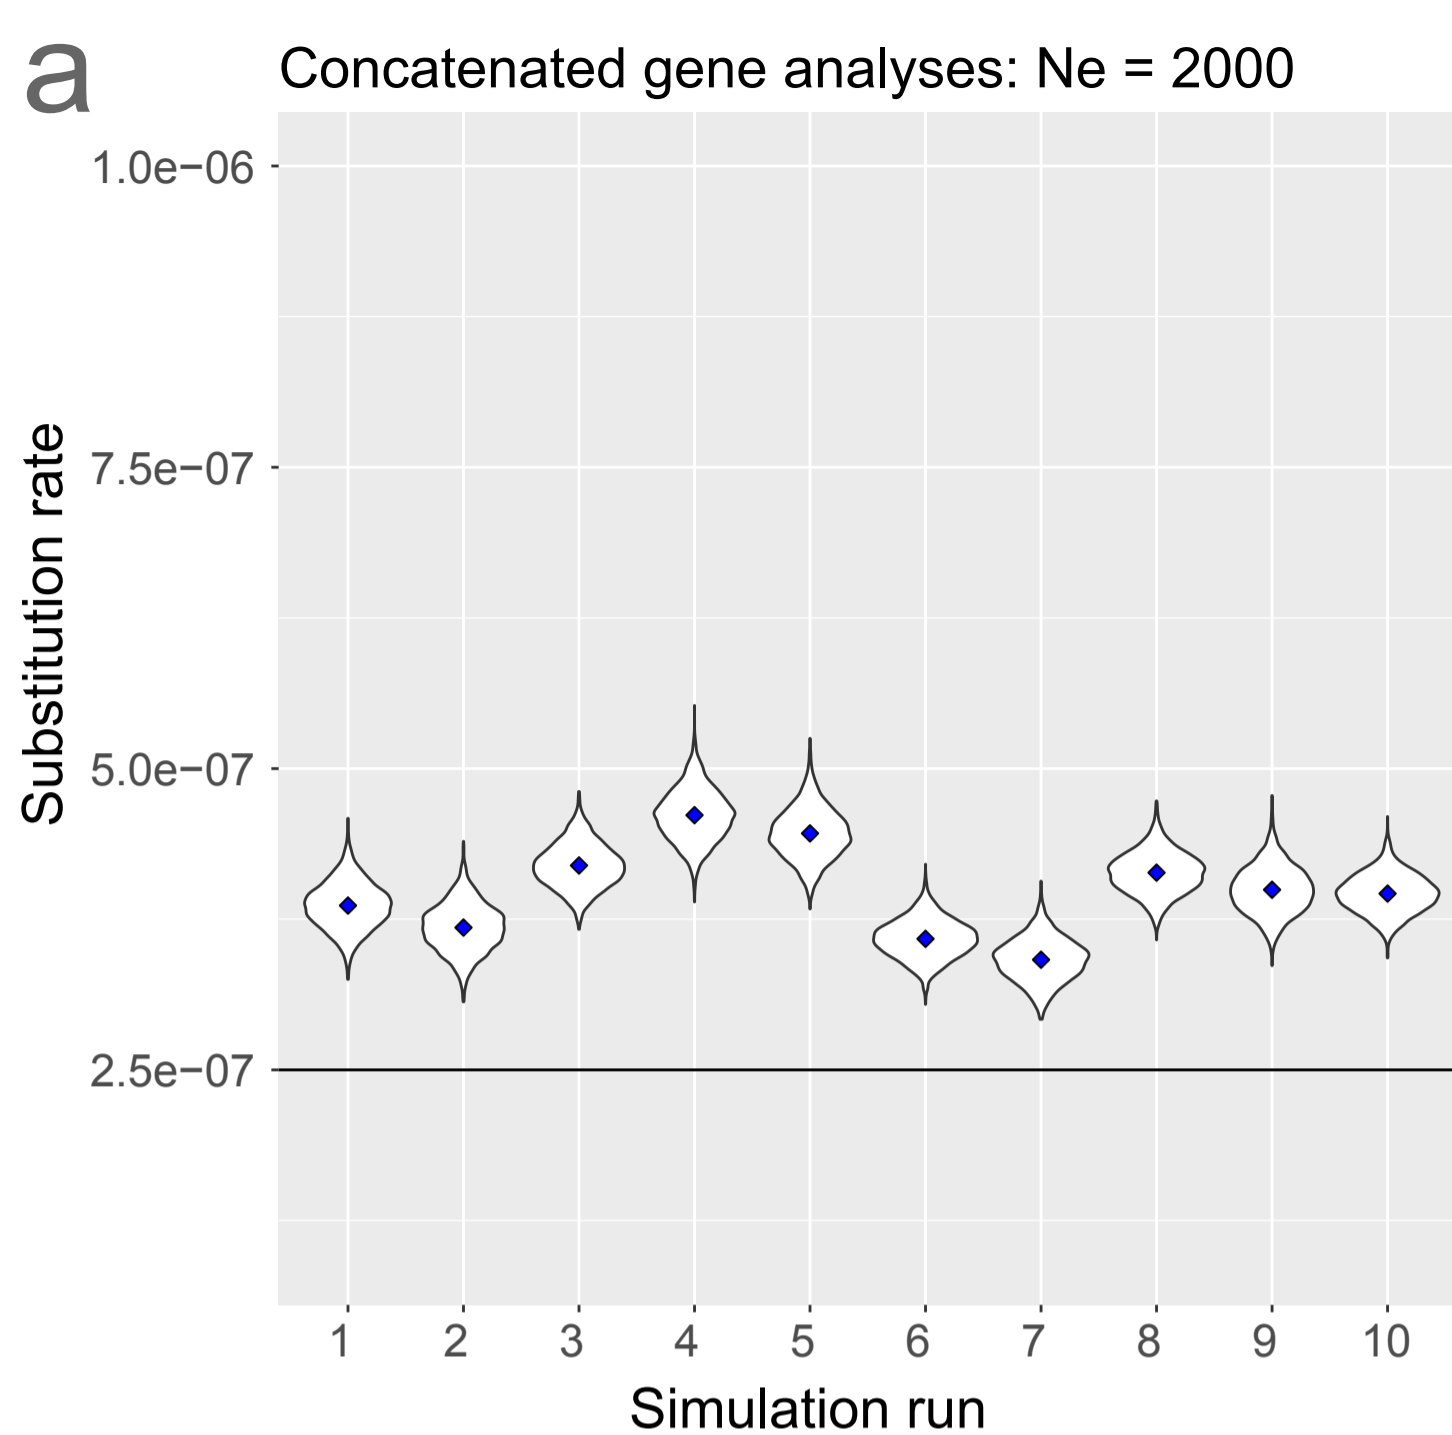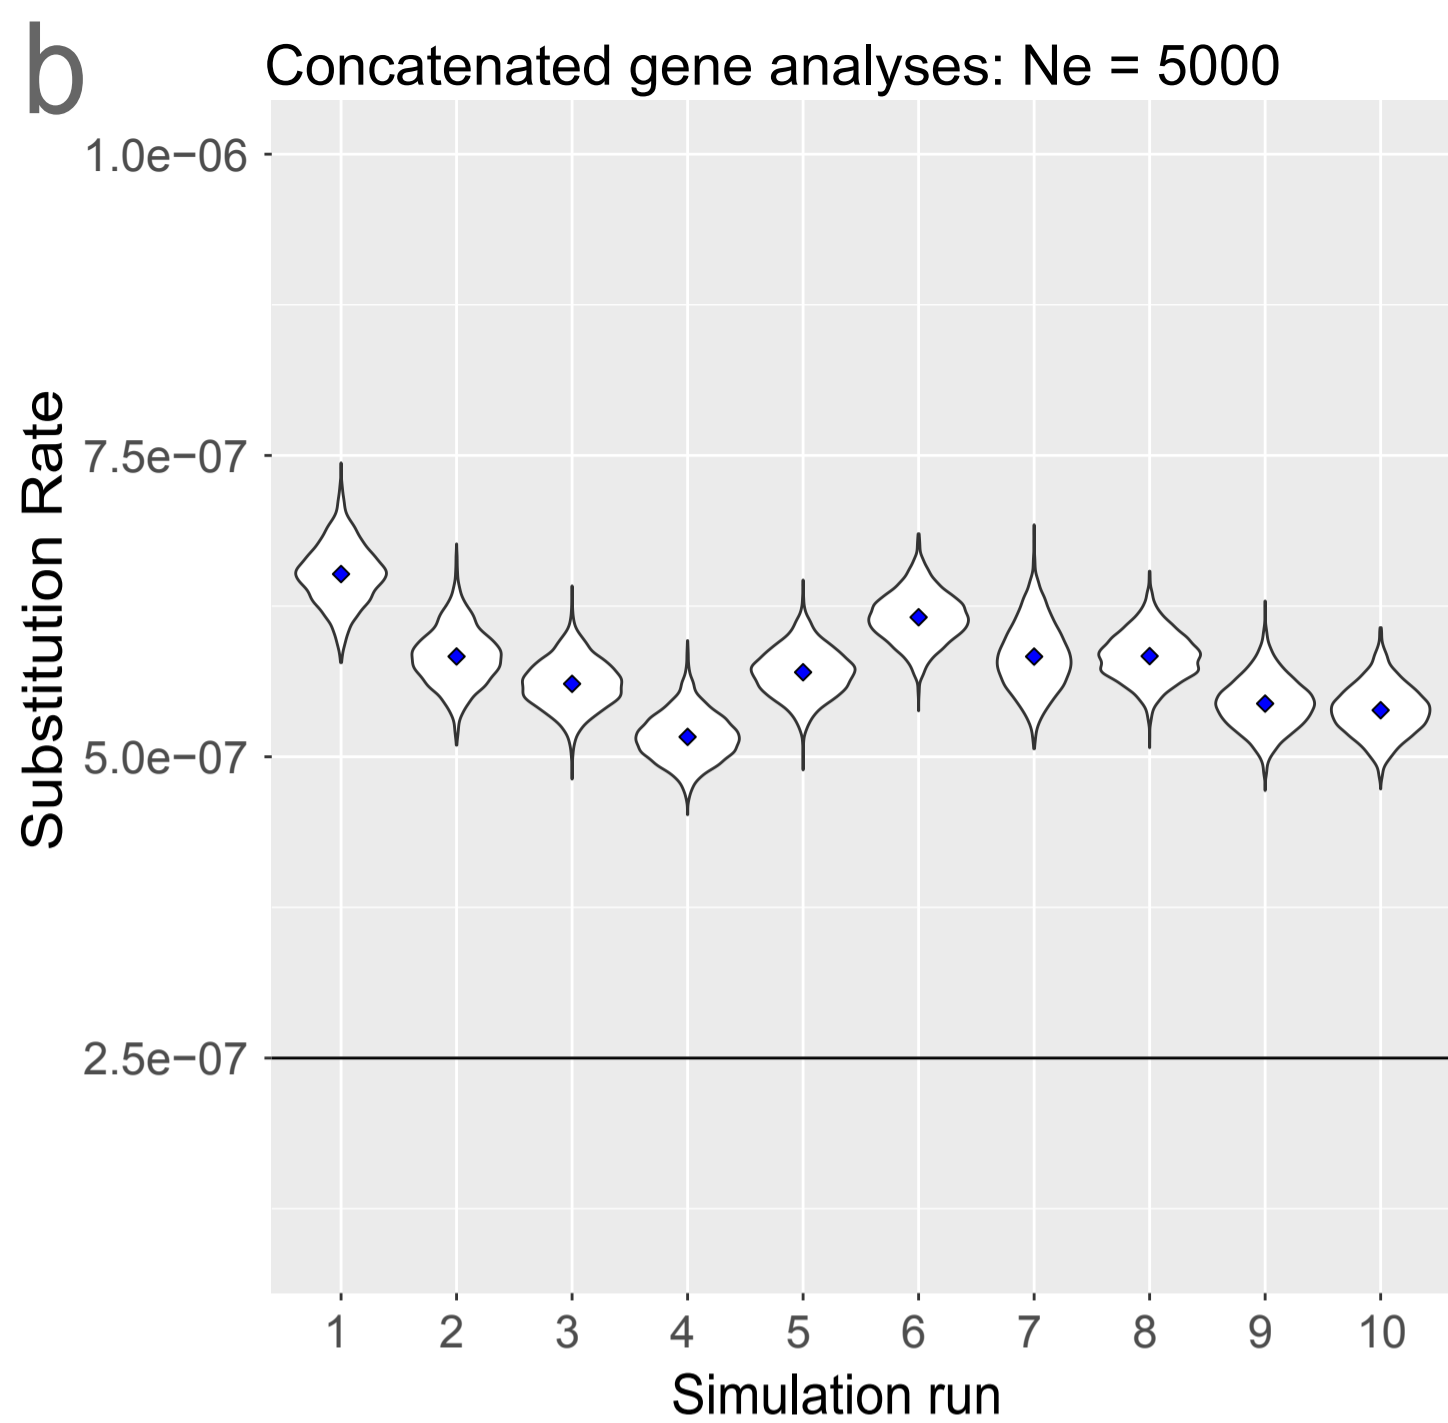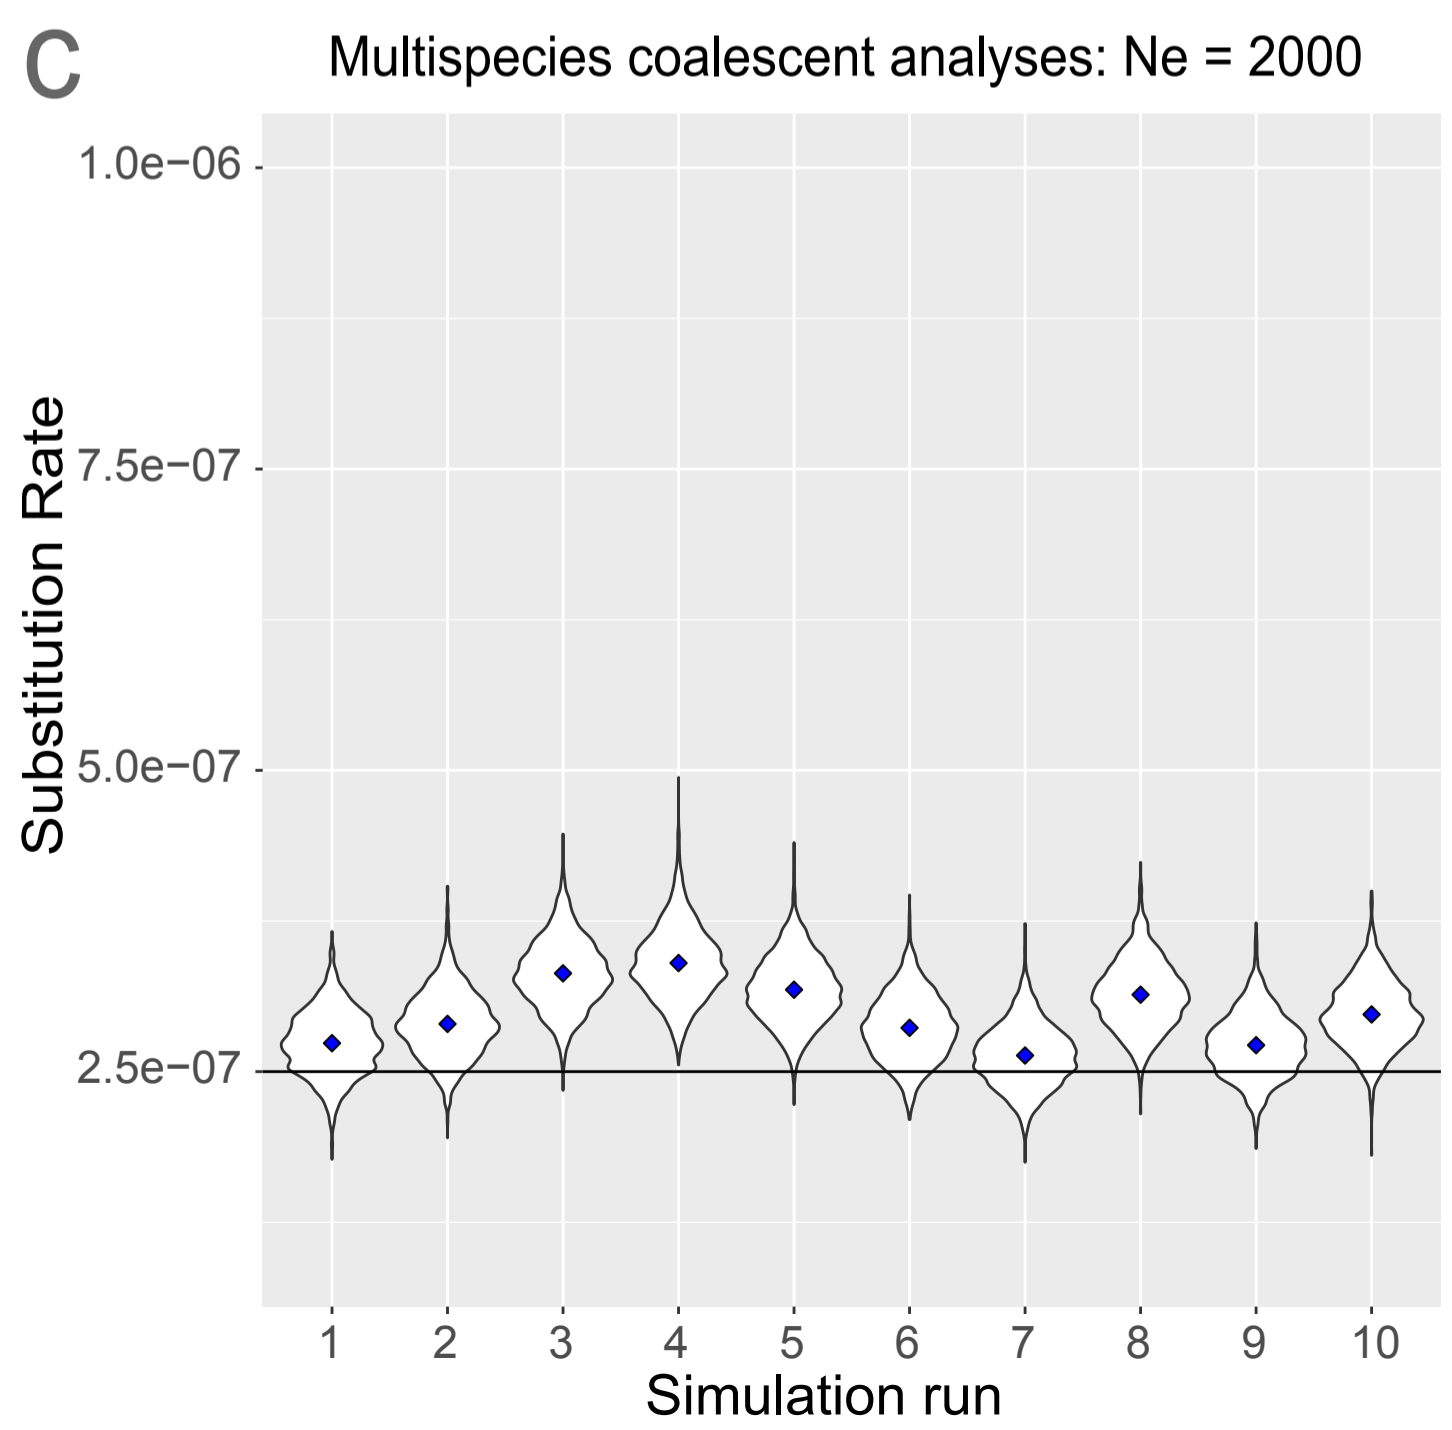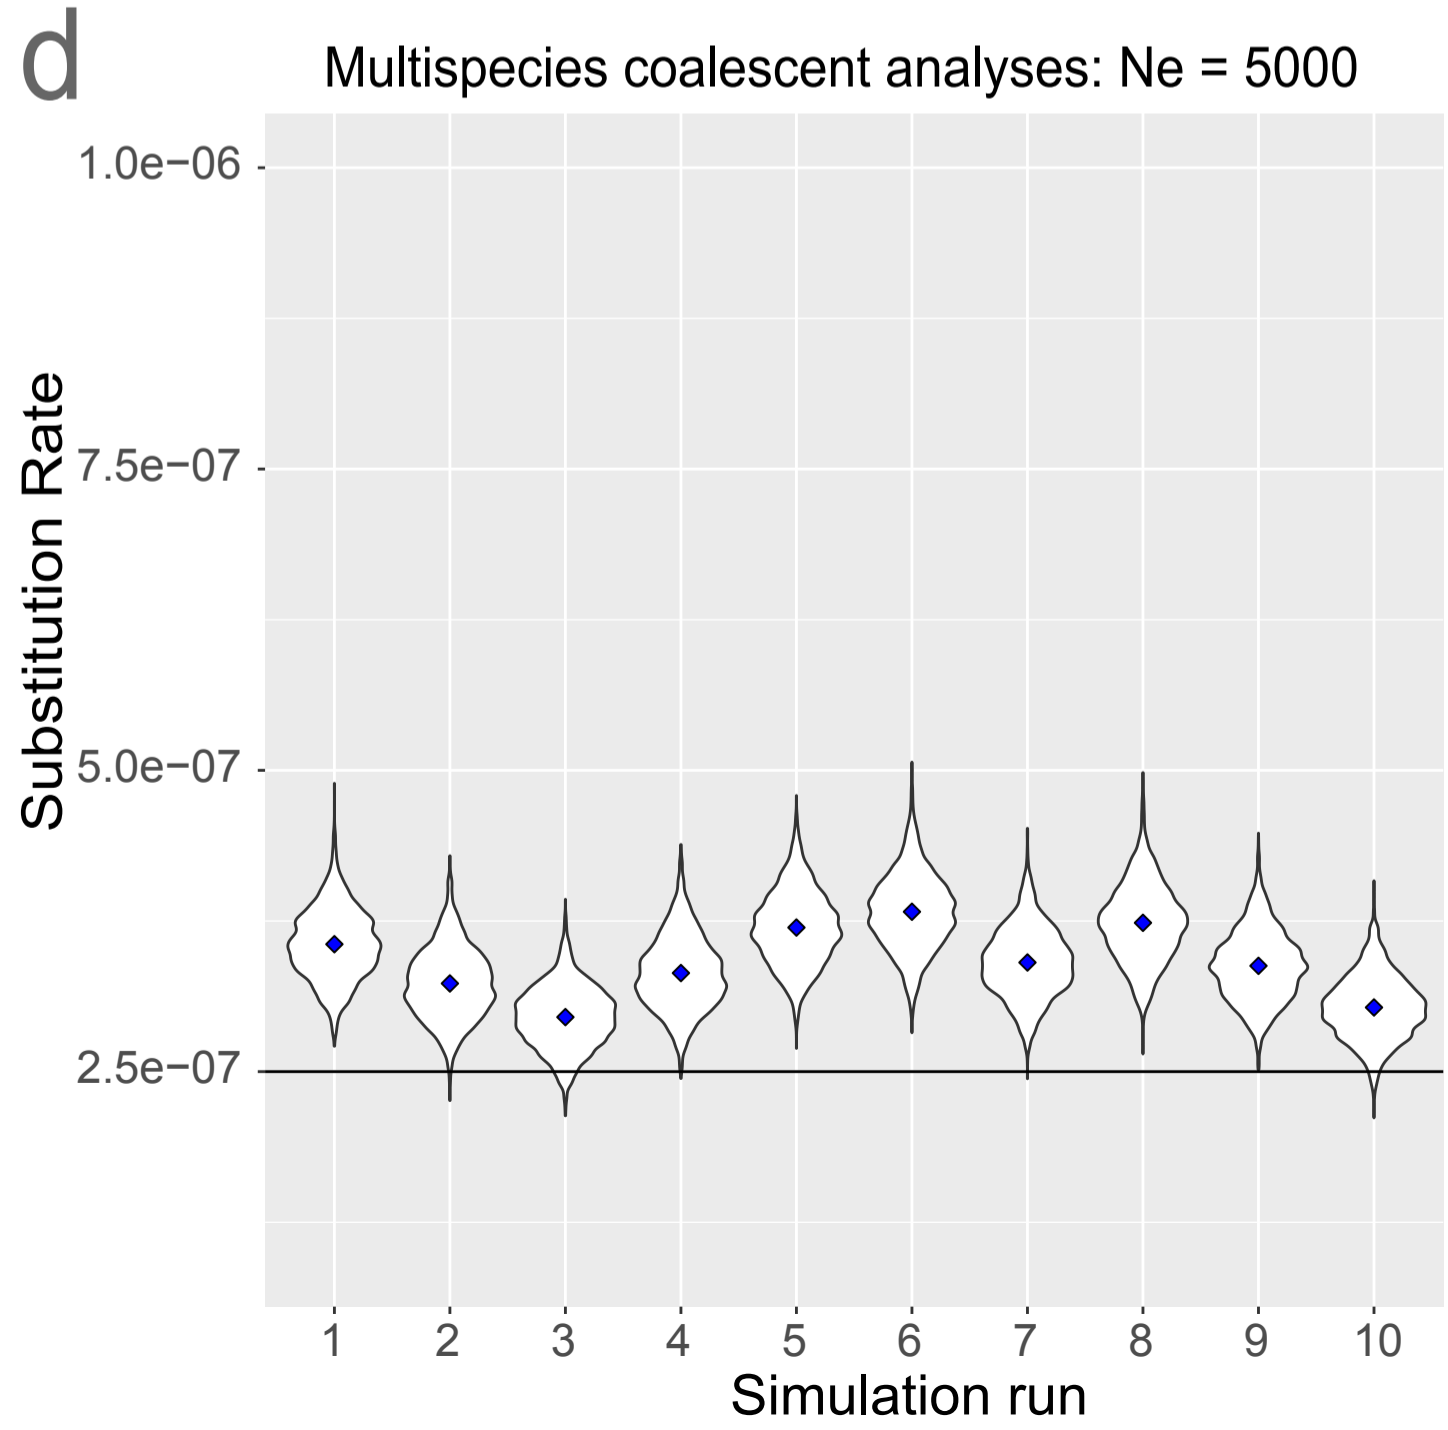

Supplement: rspb20170537supp1.pdf [file rspb20170537supp1.pdf]
